# Supplementary material
Source: publisher site journal article supplement (https://www.spandidos-publications.com/2841/downloadSupplementary)
Supplement: Supplementary file 1 [file downloadSupplementary]

## Sheet: Table SIII
Table SIII. Signaling pathways enriched by KEGG analysis of all somatic mutated genes in 14 PNETs patients.
ID	Description	GeneRatio	pvalue	p.adjust	qvalue	Gene	Count
hsa05222	Small cell lung cancer	7/41	3.38e-07	6.29e-05	3.13e-05	ITGAV/PIK3CD/ITGB1/XIAP/PIK3R3/TP53/PTEN	7
hsa04151	PI3K-Akt signaling pathway	11/41	1.01e-06	7.12e-05	3.55e-05	FGFR3/JAK3/ITGAV/EPHA2/PIK3CD/ITGB1/FGFR2/PIK3R3/ERBB4/TP53/PTEN	11
hsa05230	Central carbon metabolism in cancer	6/41	1.15e-06	7.12e-05	3.55e-05	FGFR3/PIK3CD/FGFR2/PIK3R3/TP53/PTEN	6
hsa01521	EGFR tyrosine kinase inhibitor resistance	6/41	2.56e-06	0.000119265	5.94e-05	FGFR3/NRG1/PIK3CD/FGFR2/PIK3R3/PTEN	6
hsa04015	Rap1 signaling pathway	8/41	8.74e-06	0.000314863	0.000156808	FGFR3/MAPK12/EPHA2/PIK3CD/ITGB1/FGFR2/PIK3R3/ITGAL	8
hsa05213	Endometrial cancer	5/41	1.02e-05	0.000314863	0.000156808	PIK3CD/PIK3R3/TP53/MLH1/PTEN	5
hsa05166	Human T-cell leukemia virus 1 infection	8/41	1.19e-05	0.000315805	0.000157277	JAK3/PIK3CD/XIAP/SLC25A4/PIK3R3/TP53/ITGAL/PTEN	8
hsa04218	Cellular senescence	7/41	1.4e-05	0.00032438	0.000161547	MAPK12/PIK3CD/RAD50/SLC25A4/PIK3R3/TP53/PTEN	7
hsa04722	Neurotrophin signaling pathway	6/41	2.76e-05	0.000569405	0.000283575	MAPK12/PIK3CD/PRKCD/PSEN2/PIK3R3/TP53	6
hsa01524	Platinum drug resistance	5/41	3.15e-05	0.000585438	0.000291559	PIK3CD/XIAP/PIK3R3/TP53/MLH1	5
hsa05205	Proteoglycans in cancer	7/41	6.67e-05	0.00112801	0.000561771	MAPK12/ITGAV/PIK3CD/ITGB1/PIK3R3/ERBB4/TP53	7
hsa04550	Signaling pathways regulating pluripotency of stem cells	6/41	7.45e-05	0.00115479	0.000575106	FGFR3/JAK3/MAPK12/PIK3CD/FGFR2/PIK3R3	6
hsa04810	Regulation of actin cytoskeleton	7/41	8.76e-05	0.00125393	0.000624483	FGFR3/ITGAV/PIK3CD/ITGB1/FGFR2/PIK3R3/ITGAL	7
hsa05215	Prostate cancer	5/41	0.000123437	0.00160688	0.000800255	PIK3CD/FGFR2/PIK3R3/TP53/PTEN	5
hsa01522	Endocrine resistance	5/41	0.000129587	0.00160688	0.000800255	MAPK12/NOTCH1/PIK3CD/PIK3R3/TP53	5
hsa04670	Leukocyte transendothelial migration	5/41	0.000253212	0.00294359	0.00146596	MAPK12/PIK3CD/ITGB1/PIK3R3/ITGAL	5
hsa04071	Sphingolipid signaling pathway	5/41	0.000322151	0.00328983	0.0016384	MAPK12/PIK3CD/PIK3R3/TP53/PTEN	5
hsa04919	Thyroid hormone signaling pathway	5/41	0.000322151	0.00328983	0.0016384	NOTCH1/ITGAV/PIK3CD/PIK3R3/TP53	5
hsa05223	Non-small cell lung cancer	4/41	0.000336058	0.00328983	0.0016384	JAK3/PIK3CD/PIK3R3/TP53	4
hsa04510	Focal adhesion	6/41	0.000469741	0.00416056	0.00207204	ITGAV/PIK3CD/ITGB1/XIAP/PIK3R3/PTEN	6
hsa05218	Melanoma	4/41	0.00046922	0.00416056	0.00207204	PIK3CD/PIK3R3/TP53/PTEN	4
hsa05169	Epstein-Barr virus infection	6/41	0.000495425	0.0041886	0.002086	JAK3/MAPK12/PIK3CD/PIK3R3/TP53/ITGAL	6
hsa05214	Glioma	4/41	0.000548264	0.00443378	0.00220811	PIK3CD/PIK3R3/TP53/PTEN	4
hsa04210	Apoptosis	5/41	0.000595735	0.00461695	0.00229933	PIK3CD/XIAP/TUBA3C/PIK3R3/TP53	5
hsa05418	Fluid shear stress and atherosclerosis	5/41	0.000658053	0.00489591	0.00243826	MAPK12/ITGAV/PIK3CD/PIK3R3/TP53	5
hsa05206	MicroRNAs in cancer	7/41	0.000868677	0.00570329	0.00284035	FGFR3/NOTCH1/PIK3CD/DNMT3A/PIK3R3/TP53/PTEN	7
hsa05224	Breast cancer	5/41	0.000848218	0.00570329	0.00284035	NOTCH1/PIK3CD/PIK3R3/TP53/PTEN	5
hsa05226	Gastric cancer	5/41	0.000901584	0.00570329	0.00284035	PIK3CD/FGFR2/PIK3R3/TP53/MLH1	5
hsa04012	ErbB signaling pathway	4/41	0.000880333	0.00570329	0.00284035	NRG1/PIK3CD/PIK3R3/ERBB4	4
hsa05210	Colorectal cancer	4/41	0.000919885	0.00570329	0.00284035	PIK3CD/PIK3R3/TP53/MLH1	4
hsa04014	Ras signaling pathway	6/41	0.00105304	0.00612082	0.00304828	FGFR3/EPHA2/PIK3CD/FGFR2/PIK3R3/HTR7	6
hsa05235	PD-L1 expression and PD-1 checkpoint pathway in cancer	4/41	0.00104606	0.00612082	0.00304828	MAPK12/PIK3CD/PIK3R3/PTEN	4
hsa05131	Shigellosis	6/41	0.00115062	0.00630653	0.00314077	MAPK12/PIK3CD/ITGB1/PRKCD/PIK3R3/TP53	6
hsa05219	Bladder cancer	3/41	0.00115281	0.00630653	0.00314077	FGFR3/MMP1/TP53	3
hsa05165	Human papillomavirus infection	7/41	0.00125318	0.00665978	0.0033167	NOTCH1/ITGAV/PIK3CD/ITGB1/PIK3R3/TP53/PTEN	7
hsa05161	Hepatitis B	5/41	0.00131193	0.0067783	0.00337572	JAK3/MAPK12/PIK3CD/PIK3R3/TP53	5
hsa05225	Hepatocellular carcinoma	5/41	0.00154209	0.00750215	0.00373621	TXNRD2/PIK3CD/PIK3R3/TP53/PTEN	5
hsa04750	Inflammatory mediator regulation of TRP channels	4/41	0.00161337	0.00750215	0.00373621	MAPK12/PIK3CD/PRKCD/PIK3R3	4
hsa04933	AGE-RAGE signaling pathway in diabetic complications	4/41	0.00161337	0.00750215	0.00373621	MAPK12/PIK3CD/PRKCD/PIK3R3	4
hsa04930	Type II diabetes mellitus	3/41	0.00161283	0.00750215	0.00373621	PIK3CD/PRKCD/PIK3R3	3
hsa04625	C-type lectin receptor signaling pathway	4/41	0.00186426	0.00825603	0.00411166	MAPK12/PIK3CD/PRKCD/PIK3R3	4
hsa04660	T cell receptor signaling pathway	4/41	0.00186426	0.00825603	0.00411166	MAPK12/PIK3CD/TEC/PIK3R3	4
hsa04931	Insulin resistance	4/41	0.00214109	0.00926147	0.00461239	PIK3CD/PRKCD/PIK3R3/PTEN	4
hsa05145	Toxoplasmosis	4/41	0.00244519	0.0101068	0.00503337	LDLR/MAPK12/ITGB1/XIAP	4
hsa04330	Notch signaling pathway	3/41	0.00242811	0.0101068	0.00503337	APH1B/NOTCH1/PSEN2	3
hsa03460	Fanconi anemia pathway	3/41	0.00256187	0.0103589	0.00515892	FANCM/MLH1/PALB2	3
hsa05135	Yersinia infection	4/41	0.00314045	0.0124282	0.00618947	MAPK12/PIK3CD/ITGB1/PIK3R3	4
hsa04370	VEGF signaling pathway	3/41	0.00329892	0.0127833	0.00636633	MAPK12/PIK3CD/PIK3R3	3
hsa04010	MAPK signaling pathway	6/41	0.00350095	0.0131473	0.00654759	FGFR3/MAPK12/EPHA2/FGFR2/ERBB4/TP53	6
hsa04611	Platelet activation	4/41	0.00353421	0.0131473	0.00654759	MAPK12/PIK3CD/ITGB1/PIK3R3	4
hsa04380	Osteoclast differentiation	4/41	0.00396042	0.0144439	0.00719334	MAPK12/PIK3CD/TEC/PIK3R3	4
hsa04926	Relaxin signaling pathway	4/41	0.00407219	0.0145659	0.00725411	MAPK12/MMP1/PIK3CD/PIK3R3	4
hsa04068	FoxO signaling pathway	4/41	0.00430213	0.015098	0.00751911	MAPK12/PIK3CD/PIK3R3/PTEN	4
hsa04140	Autophagy - animal	4/41	0.00504444	0.0168901	0.00841161	PIK3CD/PRKCD/PIK3R3/PTEN	4
hsa05162	Measles	4/41	0.00517601	0.0168901	0.00841161	JAK3/PIK3CD/PIK3R3/TP53	4
hsa04664	Fc epsilon RI signaling pathway	3/41	0.00492671	0.0168901	0.00841161	MAPK12/PIK3CD/PIK3R3	3
hsa05211	Renal cell carcinoma	3/41	0.00513253	0.0168901	0.00841161	PIK3CD/PIK3R3/VHL	3
hsa04917	Prolactin signaling pathway	3/41	0.00534349	0.017136	0.00853406	MAPK12/PIK3CD/PIK3R3	3
hsa05163	Human cytomegalovirus infection	5/41	0.00545246	0.0171891	0.00856051	MAPK12/ITGAV/PIK3CD/PIK3R3/TP53	5
hsa05100	Bacterial invasion of epithelial cells	3/41	0.00600748	0.0186232	0.00927471	PIK3CD/ITGB1/PIK3R3	3
hsa05010	Alzheimer disease	6/41	0.00651352	0.0198367	0.00987908	APH1B/PIK3CD/PSEN2/SLC25A4/TUBA3C/PIK3R3	6
hsa05212	Pancreatic cancer	3/41	0.00671889	0.0198367	0.00987908	PIK3CD/PIK3R3/TP53	3
hsa05220	Chronic myeloid leukemia	3/41	0.00671889	0.0198367	0.00987908	PIK3CD/PIK3R3/TP53	3
hsa05160	Hepatitis C	4/41	0.00777797	0.0226047	0.0112576	LDLR/PIK3CD/PIK3R3/TP53	4
hsa04211	Longevity regulating pathway	3/41	0.0103688	0.0296708	0.0147766	PIK3CD/PIK3R3/TP53	3
hsa04658	Th1 and Th2 cell differentiation	3/41	0.0113458	0.0318221	0.015848	JAK3/MAPK12/NOTCH1	3
hsa04215	Apoptosis - multiple species	2/41	0.0114628	0.0318221	0.015848	BIRC6/XIAP	2
hsa04666	Fc gamma R-mediated phagocytosis	3/41	0.0116829	0.0319561	0.0159147	PIK3CD/PRKCD/PIK3R3	3
hsa04360	Axon guidance	4/41	0.0132256	0.0356516	0.0177552	EPHA2/PIK3CD/ITGB1/PIK3R3	4
hsa05017	Spinocerebellar ataxia	3/41	0.0134551	0.0357197	0.0177891	RYR1/PIK3CD/PIK3R3	3
hsa04070	Phosphatidylinositol signaling system	3/41	0.013827	0.0357197	0.0177891	PIK3CD/PIK3R3/PTEN	3
hsa04914	Progesterone-mediated oocyte maturation	3/41	0.013827	0.0357197	0.0177891	MAPK12/PIK3CD/PIK3R3	3
hsa05167	Kaposi sarcoma-associated herpesvirus infection	4/41	0.0144949	0.0369322	0.0183929	MAPK12/PIK3CD/PIK3R3/TP53	4
hsa04062	Chemokine signaling pathway	4/41	0.0152925	0.0374265	0.0186391	JAK3/PIK3CD/PRKCD/PIK3R3	4
hsa05142	Chagas disease (American trypanosomiasis)	3/41	0.0149778	0.0374265	0.0186391	MAPK12/PIK3CD/PIK3R3	3
hsa04960	Aldosterone-regulated sodium reabsorption	2/41	0.0151463	0.0374265	0.0186391	PIK3CD/PIK3R3	2
hsa04620	Toll-like receptor signaling pathway	3/41	0.0157744	0.0381044	0.0189767	MAPK12/PIK3CD/PIK3R3	3
hsa04020	Calcium signaling pathway	4/41	0.0163988	0.0391048	0.0194749	RYR1/SLC25A4/ERBB4/HTR7	4
hsa04066	HIF-1 signaling pathway	3/41	0.0178694	0.0420724	0.0209529	PIK3CD/PIK3R3/VHL	3
hsa03440	Homologous recombination	2/41	0.0184109	0.0428054	0.0213179	RAD50/PALB2	2
hsa05203	Viral carcinogenesis	4/41	0.0187602	0.043079	0.0214542	JAK3/PIK3CD/PIK3R3/TP53	4
hsa04668	TNF signaling pathway	3/41	0.0191978	0.0435461	0.0216868	MAPK12/PIK3CD/PIK3R3	3
